# Supplementary material
Source: PubMed Central journal article supplement (PMC5377491)
Supplement: AEM.03276-16_zam999117771s1.pdf [file AEM.03276-16_zam999117771s1.pdf]

## **Creation of experimental lines**

To create the X-type-only and uninfected lines, aphids were selectively cured by allowing second and third instar nymphs to feed on aphid artificial diet spiked with an antibiotic cocktail containing 150 µg/mL of ampicillin, gentamycin, and cefotaxime for three days, modified from (1). Surviving aphids were placed on fresh fava bean (*Vicia faba*) plants until adulthood and a subset of their offspring (2<sup>nd</sup>-3<sup>rd</sup> instar) were collected to undergo DNA extraction. Nymphs were squished in 20-30 µL of lysis buffer (depending on size) with 1% proteinase K and incubated using the following protocol: 38° C for 35 minutes, 95° C for 2.5 minutes, and held at 4° C or on ice until screened for symbiont infection using the diagnostic PCR protocols described in (2, 3). If the antibiotic-fed mother produced offspring (F1) with the desired infection status, remaining offspring were isolated and allowed to reproduce and the screening protocol was repeated. After confirmation of symbiont infection in the F2 generation, we selected a single, parthenogenetic female to establish the experimental line, to ensure all individuals carried the desired infection status. To generate the *H. defensa*-only line, we injected hemolymph collected from superinfected aphids (XH) into the abdomens of 3<sup>rd</sup> instar aphids cured of both symbionts (UC line) using glass capillary needles with as in (2, 4). Post-microinjection, aphids were placed on fresh fava plants and underwent the same screening process as the antibiotic-exposed aphids until we confirmed infection with only *H. defensa*.

For microsatellite genotyping, aphid DNA was extracted using an E.Z.N.A. Tissue DNA Kit (Omega Bio-Tek) and stored at -20C until use. Microsatellite protocol follows (2), in which four microsatellite loci were amplified with PCR using Dye Set-30 (DS-30) fluorescent primers and a reaction cycle of: 4°C for 3 min; 45 cycles of 95°C for 30 s, 68–56°C touchdown for 13 cycles, then 55°C for 32 cycles, each cycle for 30 s, 72°C for 30 s; 72°C for final elongation, then held at 4°C. Samples were then sent to the Georgia Genomics Facility for genotyping on an Applied Biosystems 3730xl DNA Analyzer, with the ROX500 size standard. Data was analyzed using Geneious® v8.1.5.

## **Fitness assays**

Adult aphids were placed onto fresh *V. faba* plants, allowed to reproduce for 24 hours, and offspring were collected and transferred to a fresh *V. faba* plant in cohorts of five aphids. To measure survival and fecundity, aphids were checked every three days for 30 days, at which point almost all aphids had died or ceased reproduction. The number of surviving and dead

aphids were counted at each date and any offspring produced were counted and removed (to prevent being recounted), with the total output summed as lifetime fecundity.

### **Exposure to a fungal pathogen**

Prior to the experiment, corpses of aphids killed by *P. neoaphidis* were stored post-death but pre-sporulation at 4°C for no more than twelve weeks within a plastic screw cap container along with a desiccator bag. To rehydrate corpses and initiate sporulation, two corpses were centrally placed onto a freshly made 1.5% tap water agar plate. The plates were then sealed with Parafilm and held in the dark at 20°C for 14-16 hours to encourage sporulation. Sporulation was visually confirmed by the presence of large spore showers around the corpses, and corpses that failed to sporulate were discarded and not used in the experiment.

### **Quantifying symbiont titers**

Fragments of the single-copy bacterial genes, *dnaK* from *H. defensa* and *gryB* from X-type, along with the polyploid *dnaK* gene from *B. aphidicola*, were amplified using RT-qPCR (2, 5-7). The X-type primers new to this study were: forward (ACG GAG GTG AGT ACC CGA AAA) and reverse (ATC AGC GTT CAT CTC TCC CA). 10 µL PCR reactions were performed on a Roche LightCycler 480 II using Roche LightCycler SYBR Green I Master chemistry and 0.5 µM of forward and reverse primers. A standard PCR cycle was used for all primers: 95°C for 5 min; 45 cycles of 95°C for 10 sec, 68-56°C touchdown for 13 cycles, then 55°C for 32 cycles, each cycle for 10 sec; 72°C for 10 sec (7). Symbiont titers were estimated using external standard curves of each gene previously created with serial dilutions of  $1 \times 10^2$  to  $1 \times 10^9$  with duplicate standards of  $1 \times 10^7$  (8). Additionally, to correct for differing extraction efficiency between DNA samples, the aphid *Ef-1 α* gene was amplified for all samples. A correction factor was determined by dividing the highest *Ef-1 α* by the *Ef-1 α* of each sample for each time point; symbiont estimates were then multiplied by this factor.

### **SI References**

1. **Douglas AE, François CLMJ, Minto LB.** 2006. Facultative “secondary” bacterial symbionts and the nutrition of the pea aphid, *Acyrtosiphon pisum*. *Physiol Entomol* **31**:262–269.
2. **Martinez AJ, Weldon SR, Oliver KM.** 2014. Effects of parasitism on aphid nutritional and protective symbioses. *Mol Ecol* **23**:1594-1607.

3. **Henry LM, Peccoud J, Simon JC, Hadfield JD, Maiden MJ, Ferrari J, Godfray HC.** 2013. Horizontally transmitted symbionts and host colonization of ecological niches. *Curr Biol* **23**:1713-7.
4. **Oliver KM, Moran NA, Hunter MS.** 2005. Variation in resistance to parasitism in aphids is due to symbionts not host genotype. *Proc Natl Acad Sci U S A* **102**:12795-12800.
5. **Moran NA, Degnan PH, Santos SR, Dunbar HE, Ochman H.** 2005. The players in a mutualistic symbiosis: Insects, bacteria, viruses, and virulence genes. *Proc Natl Acad Sci U S A* **102**:16919-16926.
6. **Wilson AC, Dunbar HE, Davis GK, Hunter WB, Stern DL, Moran NA.** 2006. A dual-genome microarray for the pea aphid, *Acyrtosiphon pisum*, and its obligate bacterial symbiont, *Buchnera aphidicola*. *BMC Genomics* **7**:50.
7. **Weldon S, Strand M, Oliver K.** 2013. Phage loss and the breakdown of a defensive symbiosis in aphids. *Proc R Soc Lond B Biol Sci* **280**:20122103.
8. **Oliver KM, Moran NA, Hunter MS.** 2006. Costs and benefits of a superinfection of facultative symbionts in aphids. *Proc R Soc Lond B Biol Sci* **273**:1273-1280.

## **SI Results**

**Supplemental Table 1** Loci information and allele location for aphid microsatellites used to identify the genotype of 5D experimental lines. Blanks for loci indicate homozygosity.

| Experimental line | Loci   | Allele 1 | Allele 2 |
|-------------------|--------|----------|----------|
| 5D-UC             | Ap-02  | 228      | 232      |
|                   | Ap-03  | 233      | 243      |
|                   | Ap-05  | 256      | 264      |
|                   | Aph10M | 195      |          |
| 5D-H              | Ap-02  | 228      | 232      |
|                   | Ap-03  | 233      | 243      |
|                   | Ap-05  | 256      | 264      |
|                   | Aph10M | 195      |          |
| 5D-X              | Ap-02  | 228      | 232      |
|                   | Ap-03  | 233      | 243      |
|                   | Ap-05  | 256      | 264      |
|                   | Aph10M | 195      |          |
| 5D-XH             | Ap-02  | 228      | 232      |
|                   | Ap-03  | 233      | 243      |
|                   | Ap-05  | 256      | 264      |
|                   | Aph10M | 195      |          |

**SI Table 2** X-type and *H. defensa* strain and collection location information. Loci used in strain determination reported along with accession numbers. The X-type sample with a single SNP in the *accD* locus (WI42) is also included.

| Bacteria species  | Location | Loci        | Accession Number |
|-------------------|----------|-------------|------------------|
| X-type/5D         | WI       | <i>accD</i> | KY271013         |
|                   |          | <i>gyrB</i> | KY271015         |
|                   |          | <i>hrpA</i> | KY271016         |
|                   |          | <i>murE</i> | KY271017         |
|                   |          | <i>recJ</i> | KY271018         |
|                   |          | <i>rpoS</i> | KY271022         |
|                   |          | <i>16S</i>  | KY271023         |
| X-type/WI42       | WI       | <i>accD</i> | KY271014         |
| X-type            | NY       | <i>accD</i> | KY274198         |
|                   |          | <i>gyrB</i> | KY274199         |
|                   |          | <i>hrpA</i> | KY274200         |
|                   |          | <i>murE</i> | KY274201         |
|                   |          | <i>recJ</i> | KY274202         |
|                   |          | <i>rpoS</i> | KY274203         |
| <i>H. defensa</i> | WI       | <i>recJ</i> | KY271019         |
|                   |          | <i>recJ</i> | KY271020         |
|                   |          | <i>recJ</i> | KY271021         |
| <i>H. defensa</i> | WI       | <i>ptsl</i> | KY271024         |
|                   |          | <i>ptsl</i> | KY271025         |
|                   |          | <i>ptsl</i> | KY271026         |

**SI Table 3** Accession numbers for bacterial genes used to generate Enterobacteriaceae phylogeny (**Fig. 7**).

| Species                                | Loci        | Accession number  |
|----------------------------------------|-------------|-------------------|
| <i>Arsenophonus nasoniae</i>           | <i>gyrB</i> | FN545181.1        |
|                                        | <i>accD</i> | FN545267.1        |
|                                        | <i>16S</i>  | M90801.1          |
| <i>Blochmannia sp.</i>                 | <i>gyrB</i> | CP002189.2        |
|                                        | <i>accD</i> | CP002189.2        |
|                                        | <i>16S</i>  | CP002189.2        |
| <i>Enterobacter cloacae</i>            | <i>gyrB</i> | CP006580.1        |
|                                        | <i>accD</i> | CP006580.1        |
|                                        | <i>16S</i>  | CP006580.1        |
| <i>Erwinia amylovora</i>               | <i>gyrB</i> | FN434113.1        |
|                                        | <i>accD</i> | FN434113.1        |
|                                        | <i>16S</i>  | FN434113.1        |
| <i>Escherichia coli</i>                | <i>gyrB</i> | AAJT02000007.1    |
|                                        | <i>accD</i> | AAJT02000067.1    |
|                                        | <i>16S</i>  | AAJT02000023.1    |
| <i>Ewingella americana</i>             | <i>gyrB</i> | NZ_JMPJ01000058.1 |
|                                        | <i>accD</i> | NZ_JMPJ01000067.1 |
|                                        | <i>16S</i>  | NZ_JMPJ01000013.1 |
| <i>Hamiltonella defensa (A. pisum)</i> | <i>gyrB</i> | NC_012751.1       |
|                                        | <i>accD</i> | NC_012751.1       |
|                                        | <i>16S</i>  | NC_012751.1       |
| <i>H. defensa (Uroleucon)</i>          | <i>gyrB</i> | EU021842.1        |
|                                        | <i>accD</i> | EU021762.1        |
|                                        | <i>16S</i>  | AF293621.1        |
| <i>H. defensa (B. tabaci)</i>          | <i>gyrB</i> | NZ_AJLH02000014.1 |
|                                        | <i>accD</i> | NZ_AJLH02000006.1 |
|                                        | <i>16S</i>  | JF795506.1        |
| <i>Klebsiella pneumoniae</i>           | <i>gyrB</i> | AP006725.1        |
|                                        | <i>accD</i> | AP006725.1        |
|                                        | <i>16S</i>  | AP006725.1        |
| <i>Pantoea agglomerans</i>             | <i>gyrB</i> | AXOF01000028.1    |
|                                        | <i>accD</i> | AXOF01000007.1    |
|                                        | <i>16S</i>  | AXOF01000017.1    |
| <i>Photobacterium luminescens</i>      | <i>gyrB</i> | BX571869.1        |
|                                        | <i>accD</i> | BX571869.1        |
|                                        | <i>16S</i>  | BX571869.1        |
| <i>Proteus mirabilis</i>               | <i>gyrB</i> | CP012674.1        |
|                                        | <i>accD</i> | CP012674.1        |

|                                         |             |                |
|-----------------------------------------|-------------|----------------|
|                                         | 16S         | CP012674.1     |
| <i>Proteus vulgaris</i>                 | <i>gyrB</i> | CP012675.1     |
|                                         | <i>accD</i> | CP012675.1     |
|                                         | 16S         | CP012675.1     |
| <i>Regiella insecticola</i> strain 5.15 | <i>gyrB</i> | AGCA01000035.1 |
|                                         | <i>accD</i> | AGCA01000305.1 |
|                                         | 16S         | AGCA01000465.1 |
| <i>Regiella insecticola</i>             | <i>gyrB</i> | KF575207.1     |
|                                         | <i>accD</i> | KF575191.1     |
|                                         | 16S         | AF293618.1     |
| <i>Salmonella enterica</i>              | <i>gyrB</i> | ABAK02000001.1 |
|                                         | <i>accD</i> | ABAK02000001.1 |
|                                         | 16S         | ABAK02000001.1 |
| <i>Serratia marcescens</i>              | <i>gyrB</i> | CP012685.1     |
|                                         | <i>accD</i> | CP012685.1     |
|                                         | 16S         | CP012685.1     |
| <i>Serratia symbiotica</i>              | <i>gyrB</i> | GL636117.1     |
|                                         | <i>accD</i> | GL636126.1     |
|                                         | 16S         | GL636115.1     |
| <i>Shigella flexneri</i>                | <i>gyrB</i> | AE005674.2     |
|                                         | <i>accD</i> | AE005674.2     |
|                                         | 16S         | AE005674.2     |
| <i>Vibrio cholerae</i>                  | <i>gyrB</i> | AE003852.1     |
|                                         | <i>accD</i> | AE003852.1     |
|                                         | 16S         | AE003852.1     |
| <i>Wigglesworthia glossinidia</i>       | <i>gyrB</i> | CP003315.1     |
|                                         | <i>accD</i> | CP003315.1     |
|                                         | 16S         | CP003315.1     |
| <i>Xenorhabdus bovienii</i>             | <i>gyrB</i> | FN667741.1     |
|                                         | <i>accD</i> | FN667741.1     |
|                                         | 16S         | FN667741.1     |
| X-type (5D)                             | <i>gyrB</i> | KY271015       |
|                                         | <i>accD</i> | KY271013       |
|                                         | 16S         | KY271023       |
| <i>Yersinia enterocolitica</i>          | <i>gyrB</i> | AM286415.1     |
|                                         | <i>accD</i> | AM286415.1     |
|                                         | 16S         | AM286415.1     |
| <i>Yersinia pestis</i>                  | <i>gyrB</i> | ADDC01000001.1 |
|                                         | <i>accD</i> | ADDC01000001.1 |
|                                         | 16S         | ADDC01000001.1 |

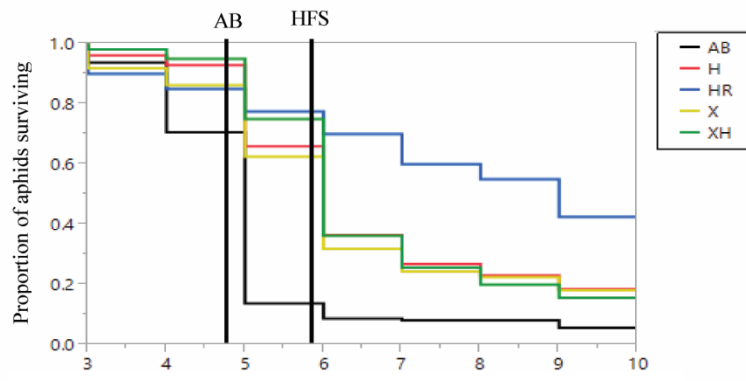

**SI Figure 1** Kaplan-Meier plot of aphid survival post exposure to *P. neoaphidis*. Dashed lines represent estimated time of 0.5 sporulation for aphids lacking facultative symbionts (UC) and those with symbionts (HFS) ( $\alpha = 0.05$ ).



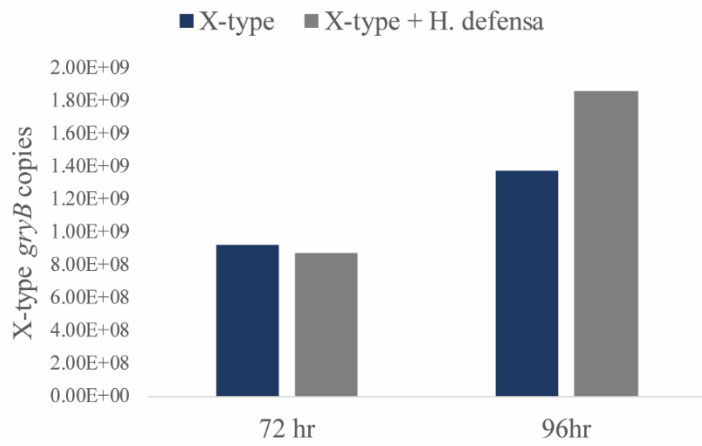

**SI Fig 2** Mean X-type *gyrB* copies in 72 and 96 hour-old aphids (genotype WI12) infected with X-type (blue) and superinfected with X-type+*H. defensa* (grey).
